# Supplementary material for: Size-controlled synthesis of CdS nanoparticles confined on covalent triazine-based frameworks for durable photocatalytic hydrogen evolution under visible light
Source: Royal Society of Chemistry journal article supplement (doi:10.1039/c8nr06691d), 2018-01-01
Supplement: c8nr06691d1.pdf [file c8nr06691d1.pdf]

Electronic Supplementary Information

**Size-Controlled Synthesis of CdS Nanoparticles Confined on Covalent Triazine-Based Frameworks for Durable Photocatalytic Hydrogen Evolution under Visible Light**

Dengke Wang,<sup>a</sup> Xiang Li,<sup>a</sup> Ling-Ling Zheng,<sup>a</sup> Lu-Mei Qin,<sup>a</sup> Shuang Li,<sup>a</sup> Peng Ye,<sup>a</sup>  
Yan Li<sup>b</sup> and Jian-Ping Zou\*<sup>a</sup>

<sup>a</sup> *Key Laboratory of Jiangxi Province for Persistent Pollutants Control and Resources Recycle, Nanchang Hangkong University, Nanchang 330063, P. R. China*

<sup>b</sup> *School of Chemistry & Molecular Engineering, East China University of Science and Technology, Shanghai 200237, China*

Corresponding author's email address: zjp\_112@126.com

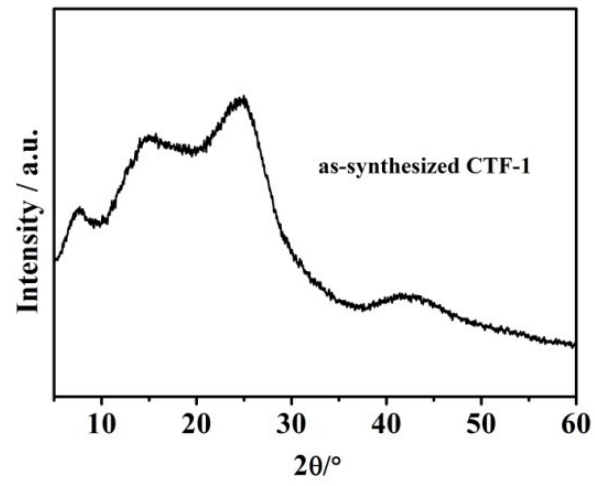

**Fig. S1** XRD pattern of the as-synthesized CTF-1.

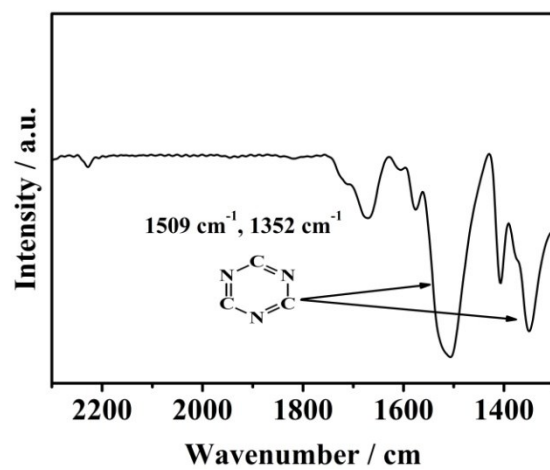

**Fig. S2** FTIR spectrum of the as-synthesized CTF-1.

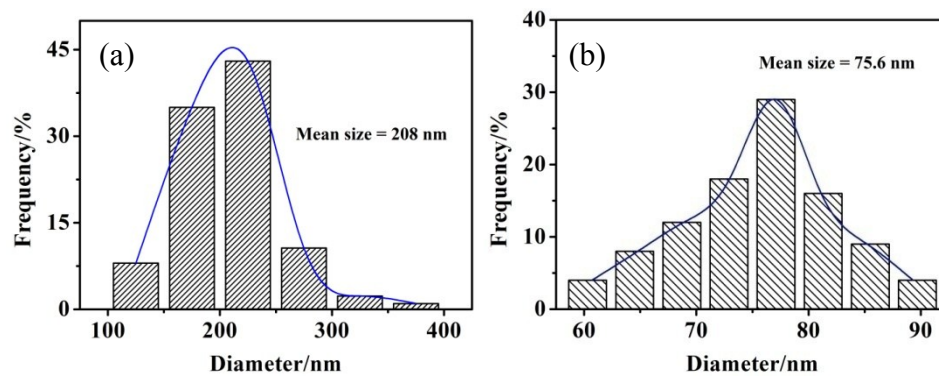

**Fig. S3** CdS nanoparticles size distribution histogram of (a) pure CdS; (b) CdS NPs/5%CTF-1.

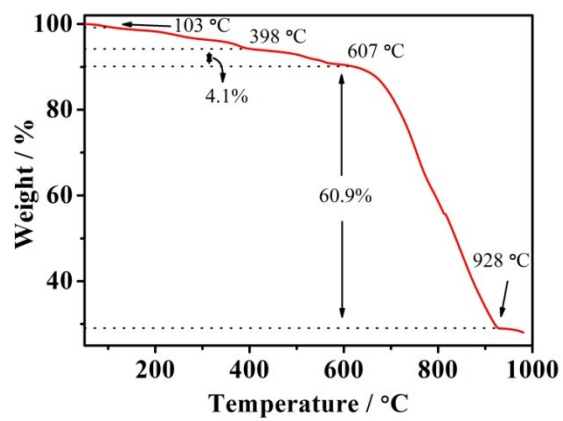

**Fig. S4** Thermogravimetric analysis of CdS NPs/5%CTF-1.

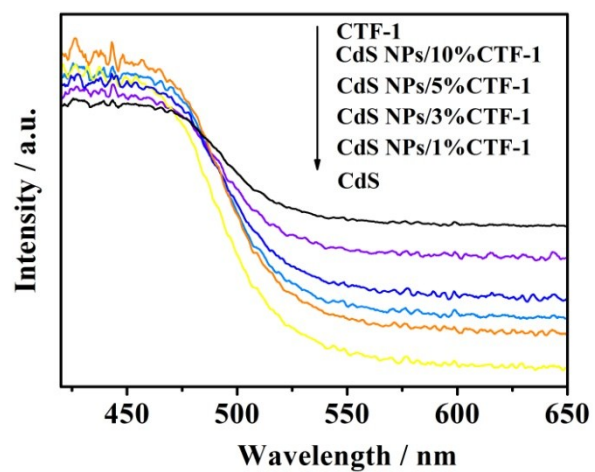

**Fig. S5** UV-vis DRS spectra of CdS, CTF-1, and CdS NPs/CTF-1 with different amount of CTF-1.

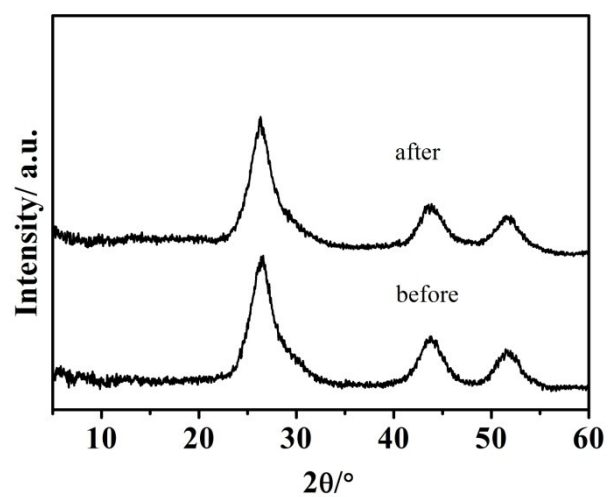

**Fig. S6** XRD patterns of CdS NPs/5%CTF-1 before and after the reactions.

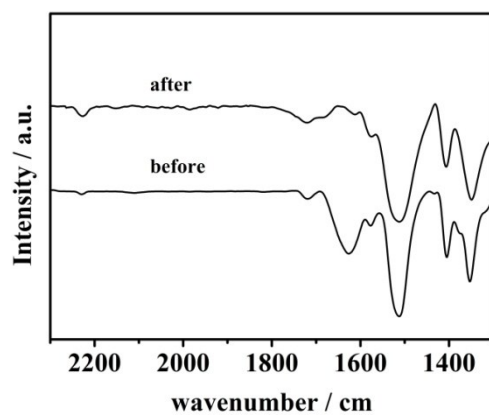

**Fig. S7** FTIR spectra of CdS NPs/5%CTF-1 before and after the reactions.



**Table S1** The comparison of photocatalytic hydrogen evolution rate between CdS NPs/3%CTF-1 and other catalysts reported previously.

| Catalyst                                       | H <sub>2</sub> evolution rate (μmolh <sup>-1</sup> g <sup>-1</sup> ) | Reference |
|------------------------------------------------|----------------------------------------------------------------------|-----------|
| CdS NPs/3%CTF-1                                | 12150                                                                | This work |
| WS <sub>2</sub> -CdS                           | 1984                                                                 | [1]       |
| MoS <sub>2</sub> -CdS                          | 1472                                                                 | [1]       |
| CdS-ZnO core-shell                             | 792                                                                  | [2]       |
| CdS/g-C <sub>3</sub> N <sub>4</sub> core/shell | 4152                                                                 | [3]       |
| Cd/CdS                                         | 11686                                                                | [4]       |

### References

- 1 J. Z. Chen, X. -J. Wu, L. S. Yin, B. Li, X. Hong, Z. X. Fan, B. Chen, C. Xue and H. Zhang, *Angew. Chem.*, 2015, **127**, 1226.
- 2 Y. P. Xie, Z. B. Yu, G. Liu, X. L. Ma and H. -M. Cheng, *Energy Environ. Sci.*, 2014, **7**, 1895.
- 3 J. Y. Zhang, Y. H. Wang, J. Jin, J. Zhang, Z. Lin, F. Huang, J. G. Yu, *ACS Appl. Mater. Interfaces*, 2013, **5**, 10317.
- 4 Q. Z. Wang, J. J. Li, Y. Bai, J. H. Lian, H. H. Huang, Z. M. Li, Z. Q. Lei and W. F. Shangguan, *Green Chem.*, 2014, **16**, 2728.
